# Supplementary material for: VCP/p97 inhibitor CB-5083 modulates muscle pathology in a mouse model of VCP inclusion body myopathy
Source: PubMed Central journal article supplement (PMC8742393; doi:10.1186/s12967-021-03186-6), 2022-01-08

A

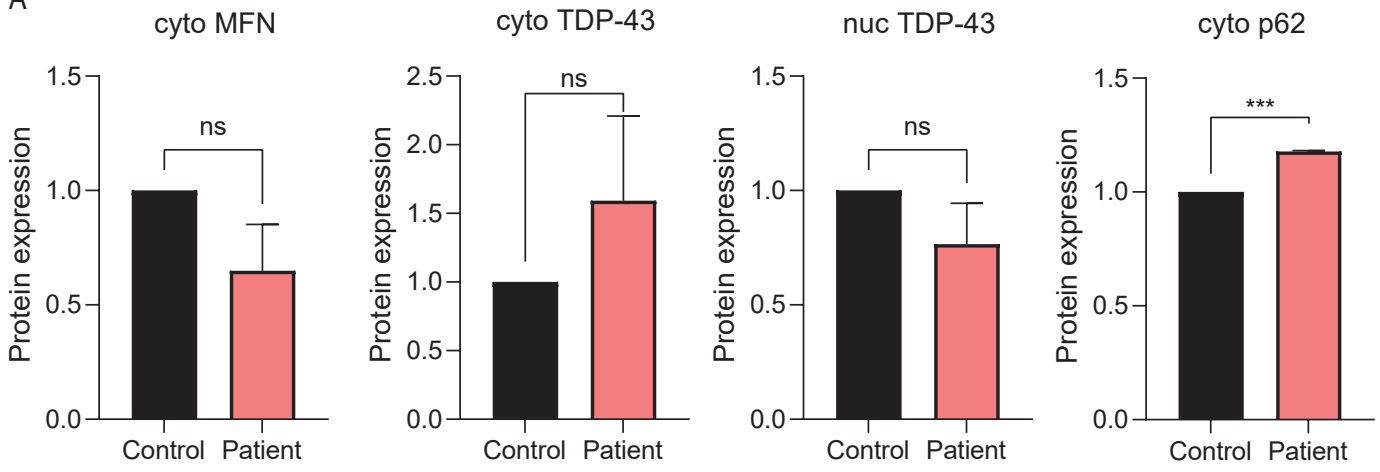

B

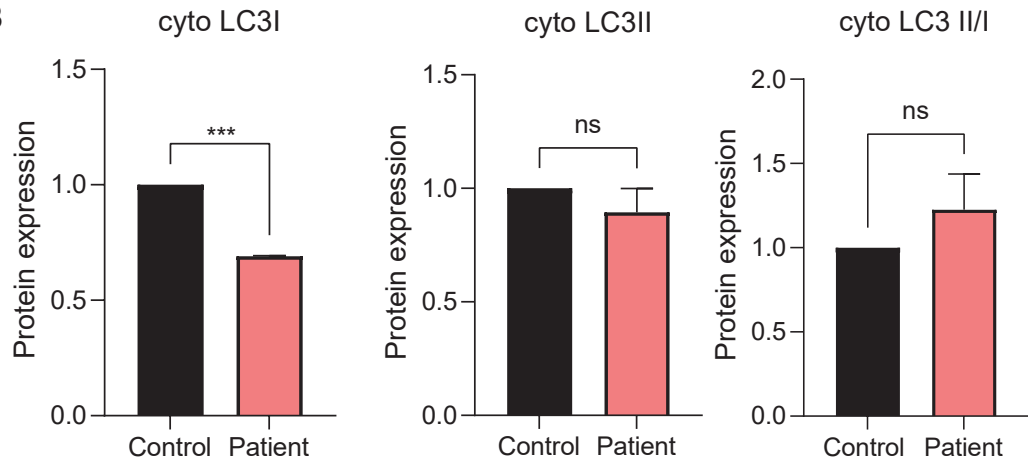

C

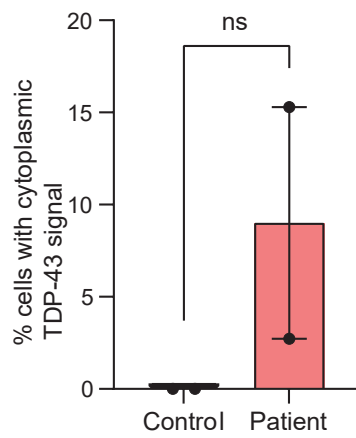

D

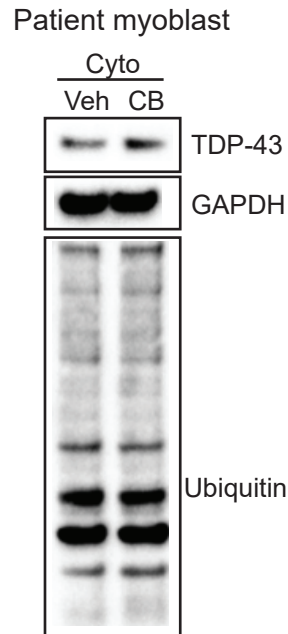

E

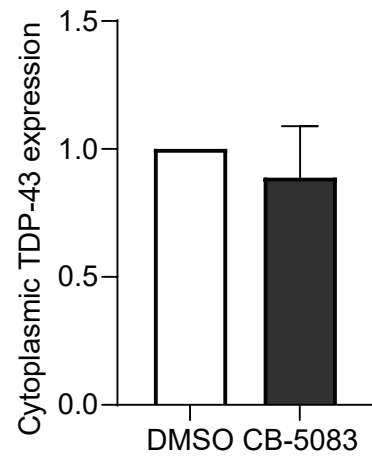

Supplement: 12967_2021_3186_MOESM1_ESM.pdf [file 12967_2021_3186_MOESM1_ESM.pdf]
